# Supplementary material for: Collection and Visualization of Dietary Behavior and Reasons for Eating Using Twitter
Source: PubMed Central journal article supplement (PMC3713881; doi:10.2196/jmir.2613), 2013-06-24
Supplement: jmir_v15i6e125_app1.pdf [file jmir_v15i6e125_app1.pdf]

**\*1. How are you accessing twitter?**

- Mobile phone  
 Desktop  
 Both

If you used both, which did you prefer?

**\*2. What application are you using to access twitter? (i.e. plume, ubertwitter, tweetcaster)****\*3. Tell us about any problems you had reporting your food intake:****\*4. Please tell us whether the foods you reported represent your "typical" food habits. If this is not your typical diet, please tell us why not.****\*5. Were you able to represent your food intake accurately with the given tags? Were there any additional hash tags you recommend we consider using in the future?****\*6. Was the training that you received adequate to prepare you to report your food intake via twitter? Please tell us what we could do to improve training.****7. Rate the usability of the applications on a 1-5 scale (1=not difficult, 5=difficult):**

|              | 1                     | 2                     | 3                     | 4                     | 5                     |
|--------------|-----------------------|-----------------------|-----------------------|-----------------------|-----------------------|
| Twitter      | <input type="radio"/> | <input type="radio"/> | <input type="radio"/> | <input type="radio"/> | <input type="radio"/> |
| Mobile phone | <input type="radio"/> | <input type="radio"/> | <input type="radio"/> | <input type="radio"/> | <input type="radio"/> |

Why did you choose this rating?

**\*8. What kind of report or feedback would you most like at the completion of the study? (i.e. graphs, write-up)****\*9. Please give us suggestions of how we can improve the overall experience of the study:**
